# Supplementary material for: Calcite U–Pb dating of altered ancient oceanic crust in the North Pamir, Central Asia
Source: Copernicus journal article supplement (doi:10.5194/gchron-4-227-2022), 2022-04-21
Supplement: Supplementary file 1 [file gchron-4-227-2022-supplement.zip]

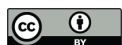

*Supplement of*

## **Calcite U–Pb dating of altered ancient oceanic crust in the North Pamir, Central Asia**

**Johannes Rembe et al.**

*Correspondence to:* Johannes Rembe (jrembe@uni-potsdam.de) and Renjie Zhou (renjie.zhou@uq.edu.au)

- gchron-4-227-2022-supplement-title-page.pdf
- S1.xlsx
- S2.xlsx
- S3.xlsx

The copyright of individual parts of the supplement might differ from the article licence.
